# Supplementary material for: A Comparison between Conventional and Extracorporeal Cardiopulmonary Resuscitation in Out-of-Hospital Cardiac Arrest: A Systematic Review and Meta-Analysis
Source: MDPI journal article supplement (doi:10.3390/healthcare10030591), 2022-03-21
Supplement: s1 [file s1]

## Supplementary Materials

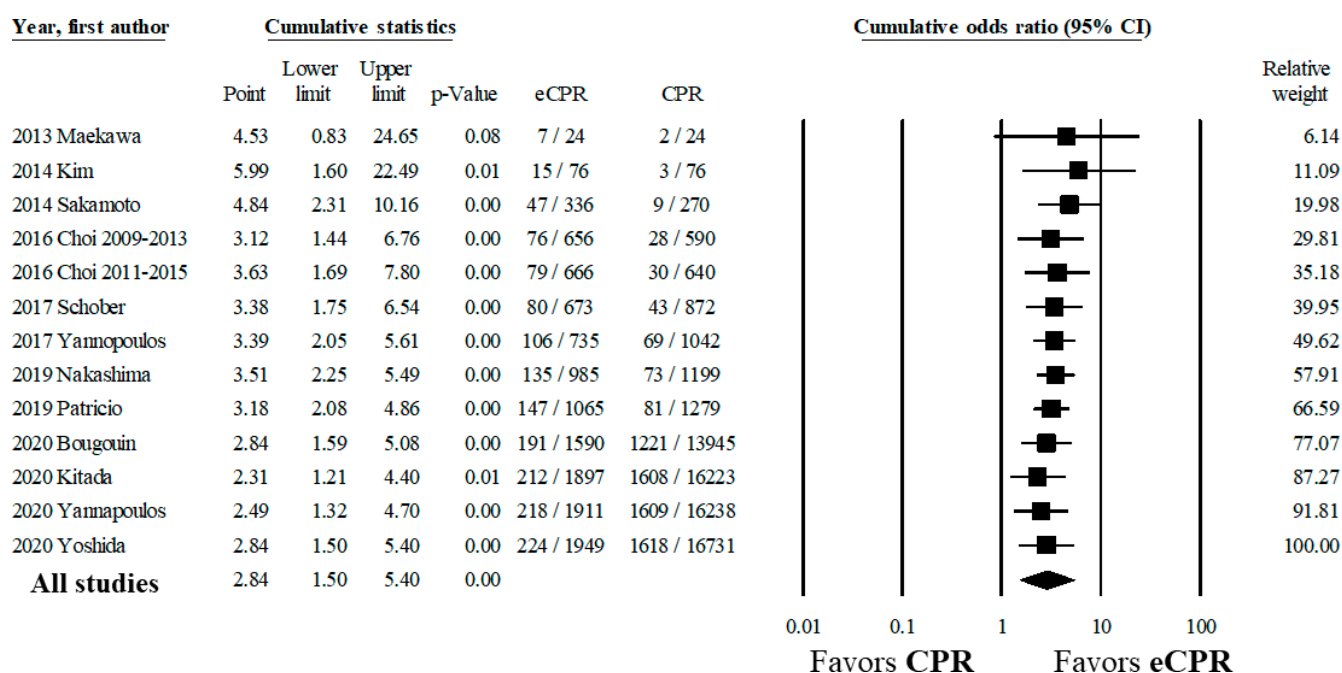

**Figure S1.** Cumulative statistical analysis for any favorable outcome

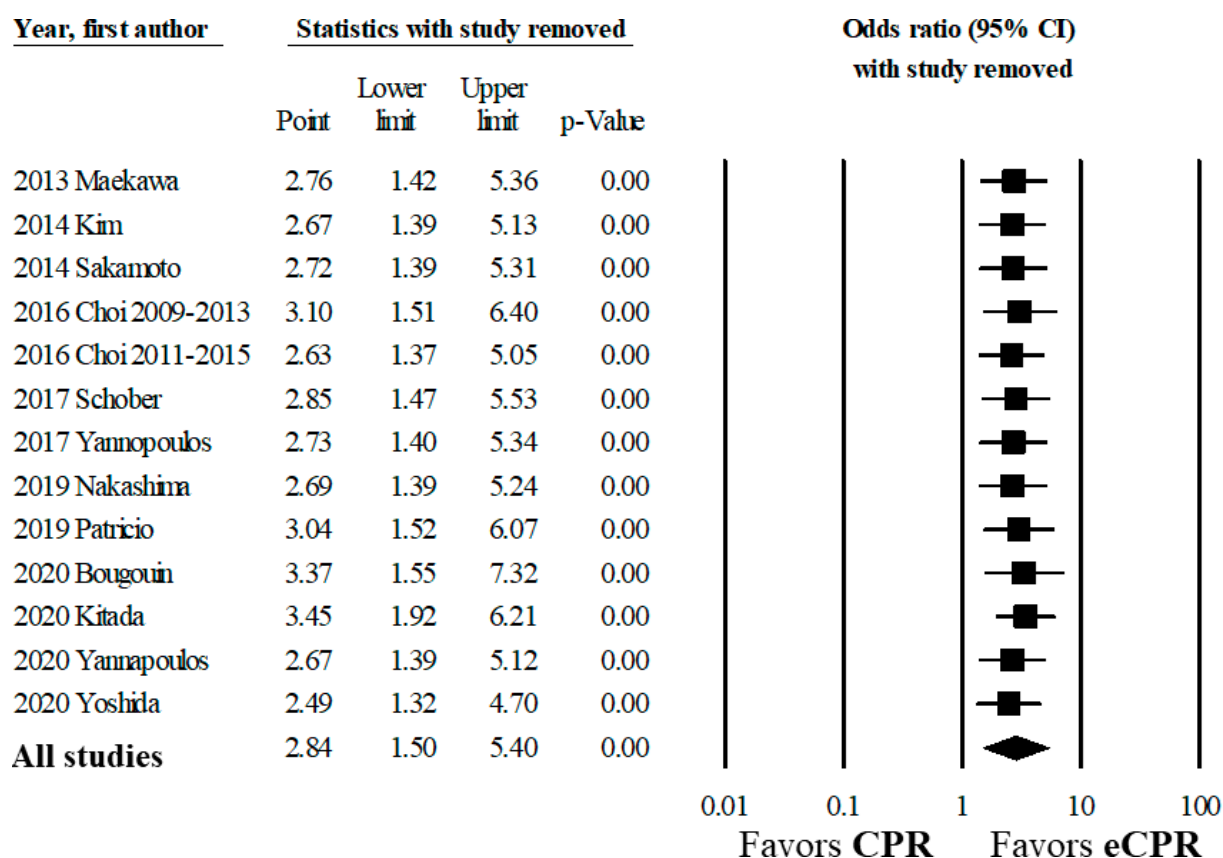

**Figure S2.** Sensitivity analysis for composite outcome of any favorable outcome
